# Supplementary material
Source: PubMed Central journal article supplement (PMC5952937)
Supplement: nmy005_supp.pdf [file nmy005_supp.pdf]

## Online Supporting Material

---

### Supplemental Methods

**Data sources and searches:** We searched the Cochrane central register of controlled trials ([www.thecochranelibrary.com](http://www.thecochranelibrary.com), through May 2017), Pub Med ([www.ncbi.nlm.nih.gov](http://www.ncbi.nlm.nih.gov), 1966-May 2017), EMBASE (Excerpta Medica database via Ovid (<http://ovidsp.tx.ovid.com>, 1980-May 2017), CINAHL (Cumulative Index of Nursing and Allied Health Literature) via Ovid (<http://ovidsp.tx.ovid.com>, 1980-May 2017) databases, proceedings of Pediatric Academic Society meetings ([www.abstracts2view.com/pasall](http://www.abstracts2view.com/pasall), 2000-May 2017) for studies reported from the earliest available online year of indexing until May 2017 using the keywords/MeSH terms [“preterm” OR “premature” OR “infant” OR “very low birth weight” OR “extremely low birth weight”] AND [“erythropoietin” OR “recombinant erythropoietin” OR “EPO”] AND “necrotizing enterocolitis”. No restrictions were applied on study design or language. References of the obtained studies were reviewed to identify additional studies. The international trial registries and Australian Clinical Trials Registry were checked for ongoing/registered trials in this area. Grey literature was searched through the national technical information services (<http://www.ntis.gov/>), Open Grey (<http://www.opengrey.eu/>), and Trove (<http://trove.nla.gov.au/>) for articles that might not have been cited in the standard medical databases. Reviewers AA, HB, SR and SP conducted the literature search independently.

**Study selection process:** Reviewers AA and HB independently assessed the eligibility for selection of all studies identified using the pre-specified search strategy. Any disagreements were resolved by discussion among all reviewers.

**Data extraction:** Reviewers AA and HB independently completed a pre-specified data extraction form for all included studies. For dichotomous outcomes, the number of participants with the event and the number of participants analysed in each treatment group of each study were entered into the form. For continuous outcomes, we entered the mean and standard deviations (SD). Information about the study design and outcomes was verified by all reviewers. Any disagreements were discussed until consensus was achieved. If required, we planned to contact the investigators for clarification and/or additional data for analysis.

**Risk of bias (ROB) in individual studies:** We used the Cochrane Neonatal Review Group guidelines to assess the methodological quality of the included RCTs (1). For each trial, information was sought regarding the method of randomization, allocation concealment and blinding and reporting of all outcomes of all participants enrolled in the trial. Reviewers AA and HB separately assessed each study. Any disagreement was resolved by discussion among all reviewers.

## Online Supporting Material

---

**Assessment of publication bias:** This was assessed by a funnel plot (1).

**Data synthesis:** Meta-analysis was conducted using the Review manager 5.3 (Cochrane collaboration, Nordic Cochrane Centre, Copenhagen, Denmark) if pooling of data was possible, and justified. A fixed effect model (FEM; Mantel-Haenszel) was used as it is the preferred meta-analytic method in CNRG reviews (<http://neonatal.cochrane.org/resources-review-authors> accessed on 23 May 2017). Meta-analysis using random effects model (REM; DerSimonian and Laird) (2) was conducted to check consistency of the results.

Effect size was expressed as relative risk (RR) and 95% confidence interval (CI). Continuous outcomes were expressed as mean difference (MD) and 95% CI, statistical heterogeneity was assessed with the  $\chi^2$  test, and  $I^2$  statistic, and by visual inspection of the forest plot (overlap of CIs). A p value  $< 0.1$  on the  $\chi^2$  statistic was considered to indicate heterogeneity.  $I^2$  values were interpreted according to the Cochrane handbook guidelines (3).

**Quality and strength of evidence:** These conclusions were based on the GRADE (grading of recommendations, assessment, development, and evaluation) system.

# Online Supporting Material

**Supplemental Table 1: The characteristics of the included studies<sup>1</sup>**

| Study number | Study authors, year (References) | Participants                               | Intervention and Control                                                                                                    | Primary Outcomes <sup>2</sup>                                                                                                                                                                                                                                                                                                                                                                                                                      | Secondary Outcomes <sup>3</sup>                                                                                                                                                                                                                                                                                 | Conclusions                                                                                                                           | Comments                    |
|--------------|----------------------------------|--------------------------------------------|-----------------------------------------------------------------------------------------------------------------------------|----------------------------------------------------------------------------------------------------------------------------------------------------------------------------------------------------------------------------------------------------------------------------------------------------------------------------------------------------------------------------------------------------------------------------------------------------|-----------------------------------------------------------------------------------------------------------------------------------------------------------------------------------------------------------------------------------------------------------------------------------------------------------------|---------------------------------------------------------------------------------------------------------------------------------------|-----------------------------|
| 1            | Arif et al., 2005 (48)           | Preterm infants <33 weeks, <1500g (n=292)  | rhEPO (n=142, Dose: 200U/kg) administered twice a week subcutaneously from day 7 to 6 weeks of life; control (n=150)        | (EPO group before and after intervention): serum erythropoietin levels: 11.3 ±6.1mU/ml* and 38.3 ±19.1mU/ml* before and at the fourth week of the study**.<br><br>Reticulocyte counts: 146 ×106±28 ×10 <sup>6</sup> /ml*, and 122 ×106±27 ×10 <sup>6</sup> /ml*, at the fourth and seventh week of the study**.<br><br>(EPO vs. no EPO): Hematocrit values**: 31.2 ± 1.8* vs. 33.5 ± 1.6*. The need for packed cell transfusions 47% vs. 62.6% **. | (EPO vs. no EPO): WBC count at 6 months: 9.8 ± 0.9* vs. 9.3 ± 1.6*, P<0.001, reticulocyte count: 77 ± 14* ×10 <sup>6</sup> /ml* vs. 76 ± 12*, P=0.502; mortality rate: 14.6% vs. 13.3%, P>0.05; CLD: 4.2% vs. 3.3%; nosocomial infection: 19% vs. 23.3%; NEC: 4.9% vs. 4%; ROP: 23.9% vs. 26%, P> 0.05 for all. | rhEPO stimulates erythropoiesis in low birth weight premature newborns and decreases the transfusion needs for anaemia of prematurity | short duration of treatment |
| 2            | Bierer et al., 2006 (38)         | Preterm infants birth weight <1000g (n=16) | Intravenous rhEPO (n=7, Dose: 400U/kg 3 times/week); placebo (n=9, sham injections) from 96 hours of life till 35 weeks PMA | (EPO vs. placebo): MDI: 96±11* vs. 78±7*; PDI: 87±13* vs. 80±7*                                                                                                                                                                                                                                                                                                                                                                                    | (EPO vs. placebo): NEC: 0/7 vs. 0/8 <sup>‡</sup> ; BPD: 5/7 vs. 8/8 <sup>‡</sup> ; ROP: 1/7 vs. 2/8 <sup>‡</sup> ; PDA: 4/7 vs. 3/8 <sup>‡</sup> ; IVH: 0/7 vs. 1/8 <sup>‡</sup> ; mortality: 0/7 vs. 1/9                                                                                                       | EPO concentrations did not correlate with PDI or overall neurodevelopmental impairment.                                               | Small sample size           |

## Online Supporting Material

|   |                             |                                             |                                                                                                                                                                                |                                                                                                                                                                                                                                                                                                                                            |                                                                                                                                                                                                                                                                                                |                                                                                      |                                                |
|---|-----------------------------|---------------------------------------------|--------------------------------------------------------------------------------------------------------------------------------------------------------------------------------|--------------------------------------------------------------------------------------------------------------------------------------------------------------------------------------------------------------------------------------------------------------------------------------------------------------------------------------------|------------------------------------------------------------------------------------------------------------------------------------------------------------------------------------------------------------------------------------------------------------------------------------------------|--------------------------------------------------------------------------------------|------------------------------------------------|
| 3 | Fauchere et al. , 2008 (39) | Preterm infants 24 0/7- 31 6/7 weeks (n=45) | rhEPO (n=30, Dose: 3000 U/kg) intravenously; placebo: 0.9% NaCl (n=15) at 3 to 6,12 to 18 and 36 to 42 hours after birth during a period of 10 min.                            | (EPO vs. Placebo): IVH: OR: 1.2; 95% CI: 0.130, 4.600; PVL:OR:0.18; 95% CI: 0.008, 1.300; ROP:OR 0.64; 95% CI: 0.061, 6.800                                                                                                                                                                                                                | (EPO vs. Placebo): sepsis: OR: 0.840; 95% CI: 0.200 ,3.900; NEC: OR: 0.00; 95% CI: 0.00, 1.700; PDA: OR: 2.600; 95% CI: 0.650, 11.000; AOP:OR:0.00; 95%CI: 0.000, 38.00; CLD: OR: 0.870; 95% CI: 0.240, 3.200; mortality: 5/30 vs. 0/15; weight at discharge (SD): 2567g (467) vs. 2653g (557) | rhEPO caused no significant adverse effects                                          | Small sample size, short duration of treatment |
| 4 | Fauchere et al., 2015 (41)  | Preterm infants 26-316/7weeks (n=443)       | rhEPO intravenously (n=229, Dose: 3000U/kg); 0.9% NaCl (n=219) at 3, 12-18 and 36-42 hours of birth.                                                                           | (EPO vs. Placebo): mortality rate: OR: 1.1; 95% CI: 0.5, 2.5; IVH: OR: 1; 95% CI: 0.6,1.6; ventricular dilatation: OR: 0.7; 95% CI: 0.2, 3.2; Cystic PVL: OR: 1.3; 95% CI: 0.3,5.7; ROP: OR: 0.9; 95% CI: 0.5,1.8; sepsis: OR: 1; 95% CI: 0.6,1.7; NEC: OR: 0.6; 95% CI:0.2,1.5; PDA: OR: 0.4; 95% CI: 0.1-1.2; BPD: OR: 1; 95% CI: 0.7,1. | (EPO vs. Placebo): Weight diff 102 (-0.2 to 204), Head circumference diff. 0.3 (-0.04 to 0.6),mortality: 12/214 vs12/229,OR: 1.1; 95% CI: 0.5-2.5; weight at discharge(SD): 2547 (484) vs. 2649 (572)                                                                                          | rhEPO is safe and cause no excess mortality or major adverse events.                 | Short duration of treatment                    |
| 5 | Ganzoury et al.,2014 (47)   | Preterm infants ≤33 weeks (n=90)            | Enteral rhG-CSF (n=20, Dose:4.5µg/kg); Enteral rhEPO (n=20, Dose: 88U/kg); Enteral rhG-CSF plus enteral rhEPO (n=20) for 7 days or normal saline as placebo control for 7 days | (EPO vs. Placebo): NEC: 0/40 vs. 3/30, P=0.165; Age at starting feeds: 2.3±1.75* vs. 1.7±1.4 *days, P=0.16; Time to reach 50% enteral feeds: 7.2±4.1* vs. 8.2±4.2* days, P=0.04; time to reach full enteral feeds:13.4 ±4.9 *vs. 16.3 ±5.3*, P=0.032                                                                                       | (EPO vs. Placebo): WBC count: 17.8±6.6* vs. 15.5±7.3*, P=0.25; Haemoglobin: 1.7±5.5* vs. 15.4±2.9*, P=0.27; Platelet count: 260±133* vs. 215±94*, P=0.19; mortality: 2/10 vs. 3/10, P=0.92                                                                                                     | Enteral rhG-CSF and/or rhEPO improves feeding outcome and decreases the risk of NEC. | Small sample size, short duration of treatment |
| 6 | Gorman et al., 2015         | Preterm infants 26-31                       | rhEPO intravenously (n=225, Dose: 3000U/Kg); 0.9% NaCl                                                                                                                         | (EPO vs. Placebo): white matter development: Fractional anisotropy:                                                                                                                                                                                                                                                                        | (EPO vs. Placebo): ROP: 3/24vs 4/34, P=0.77; NEC: 0/24 vs. 1/34, P=0.58;                                                                                                                                                                                                                       | Early rhEPO administration improves                                                  | Short duration of treatment,                   |

## Online Supporting Material

|    |                              |                                                                     |                                                                                                                            |                                                                                                                                                                                                                      |                                                                                                                                                                                                                                 |                                                                                                                           |                                                |
|----|------------------------------|---------------------------------------------------------------------|----------------------------------------------------------------------------------------------------------------------------|----------------------------------------------------------------------------------------------------------------------------------------------------------------------------------------------------------------------|---------------------------------------------------------------------------------------------------------------------------------------------------------------------------------------------------------------------------------|---------------------------------------------------------------------------------------------------------------------------|------------------------------------------------|
|    | (40)                         | weeks ( $n=440$ )                                                   | ( $n=215$ ) at 3, 12-18, and 36-42 hours of birth.                                                                         | coefficient 0.019; SE:0.004; **                                                                                                                                                                                      | sepsis:3/24 vs. 5/34, $P=0.88$ ; BPD: 2/24 vs. 5/34, $P=0.38$ ;birth weight: $0.27 \pm 0.71^*$ vs. $-0.19 \pm 0.95^*$ , $P=0.72$                                                                                                | white matter development in preterm infants                                                                               | small sample size                              |
| 7  | Haiden et al., 2005 (56)     | ELBW infants $\leq 32$ weeks ( $n=40$ )                             | rhEPO intravenously/subcutaneously ( $n=21$ , Dose: 300U/kg/700U/kg); Control ( $n=19$ ) during the first week of life     | (EPO vs. Placebo): TRAP-6 induced expression of P-selectin, $P<0.05$                                                                                                                                                 | (EPO vs. no EPO): IVH: 7/21 vs. 5/19 <sup>‡</sup> ; CLD: 6/21 vs. 8/19 <sup>‡</sup> ; NEC: 3/21 vs. 0/19 <sup>‡</sup> ; PDA: 3/21 vs. 2/19 <sup>‡</sup> ; ROP: 1/21 vs 2/19 <sup>‡</sup> ; Death: 3/21 vs. 4/19**               | EPO therapy has a short-lasting effect on platelet reactivity toTRAP-6 in ELBW infants during the first two weeks of life | Small sample size, short duration of treatment |
| 8  | Lima-Rogel et al., 1998 (60) | Preterm infants $<26$ weeks, birth weight 759g to 1500g ( $n=40$ )  | Enteral rhEPO ( $n=21$ , Dose: 150U/kg/day); placebo ( $n=19$ ) for four weeks                                             | (EPO vs. Placebo): TRAP-6 induced expression of P-selectin, $P<0.05$                                                                                                                                                 | (EPO vs. no EPO): IVH: 7/21 vs. 5/19 <sup>‡</sup> ; CLD: 6/21 vs. 8/19 <sup>‡</sup> ; NEC: 3/21 vs. 0/19 <sup>‡</sup> ; PDA: 3/21 vs. 2/19 <sup>‡</sup> ; ROP: 1/21 vs. 2/19 <sup>‡</sup> ; Death: 3/21 vs. 4/19 <sup>‡</sup> . | rEPO is effective in reducing the transfusion in preterm very low birth weight infants                                    | small sample size, short duration              |
| 9  | Maier et al., 1994 (49)      | Preterm infants $\leq 33$ weeks; birth weight 750-1499g ( $n=241$ ) | Subcutaneous rhEPO ( $n=120$ , Dose: 250U/kg 3 times/week); control ( $n=121$ ) from day 3 to 42                           | (EPO vs. control): cumulative median volume transfused:0.09 vs. 0.41; $P=0.044$ ; mean no: of transfusions per infant:0.87 vs. 1.25, $P=0.013$                                                                       | (EPO vs. control): NEC: 6/120 vs. 8/121 <sup>‡</sup> ; septicaemia: 14/120 vs.7/121 <sup>‡</sup> ; IVH: 8/120 vs. 9/121 <sup>‡</sup> ; mortality: 3/120 vs. 3/121 <sup>‡</sup>                                                  | VLBW infants have lesser need of transfusions if EPO is given during the first six weeks of life                          | Small sample size, short duration of treatment |
| 10 | Maier et al., 2002 (42)      | Preterm ELBW infants 500-999g ( $n=219$ )                           | early rhEPO: rhEPO intravenously from 1 <sup>st</sup> to 9 weeks ( $n=74$ ,Dose:750U/kg/week); late rhEPO: rhEPO iv during | (early EPO vs. control): no transfusion and hematocrit levels never below 30%: RR: 0.68; 95% CI: 0.48,0.96; $P=0.03$ (late EPO vs. control): no transfusion and hematocrit levels never below 30%: RR: 0.76; 95% CI: | (Early EPO vs. late EPO vs. control): PDA: 24/74 vs. 24/74 vs. 23/71, $P=0.71$ ; NEC: 7/74 vs7/74 vs. 8/71, $P=0.91$ ; IVH: 22/74 vs. 16/74 vs. 18/71, $P=0.58$ ; PVL: 0/74 vs. 5/74 vs1/71, $P=0.03$ ; ROP: 42/74              | Early rhEPO treatment effectively reduces the need for transfusion in ELBW infants.                                       | Short duration in late EPO group               |

## Online Supporting Material

|           |                              |                                                        |                                                                                                                                                       |                                                                                                                                                                                                                                                                                                    |                                                                                                                                                                                                                                                                                                                                     |                                                                                                                                                                  |                                                |
|-----------|------------------------------|--------------------------------------------------------|-------------------------------------------------------------------------------------------------------------------------------------------------------|----------------------------------------------------------------------------------------------------------------------------------------------------------------------------------------------------------------------------------------------------------------------------------------------------|-------------------------------------------------------------------------------------------------------------------------------------------------------------------------------------------------------------------------------------------------------------------------------------------------------------------------------------|------------------------------------------------------------------------------------------------------------------------------------------------------------------|------------------------------------------------|
|           |                              |                                                        | 4weeks-6weeks ( $n=74$ , Dose: 750U/Kg/week); control group: no rhEPO ( $n=71$ ).All received enteral iron 3-9mg/kg/day from 1 <sup>st</sup> week     | 0.54,1.07; $P=0.12$                                                                                                                                                                                                                                                                                | vs. 34/74 vs. 38/71, $P=0.27$                                                                                                                                                                                                                                                                                                       |                                                                                                                                                                  |                                                |
|           |                              |                                                        |                                                                                                                                                       | (early EPO vs. late EPO vs. control): Transfusion volume 0.4 vs. 0.5 vs. 0.7, $P=0.02$ ; median donor exposure:1vs. 1 vs. 2, $P=0.05$                                                                                                                                                              |                                                                                                                                                                                                                                                                                                                                     |                                                                                                                                                                  |                                                |
| <b>11</b> | Meyer et al.,1994 (50)       | Preterm infants $\leq 32$ weeks; ( $n=80$ )            | Subcutaneous rhEPO ( $n=40$ , Dose: 600U/kg /week); placebo ( $n=40$ ) for up to 6 weeks.                                                             | (EPO vs. placebo): Number of blood transfusions: 7/40 vs. 21/40; $P=0.002$ ; no: of infants transfused: 6/40 vs. 17/40, $P=0.013$ ; mean hematocrit: $32.3 \pm 4\%$ vs. $29.3 \pm 6.2\%$ , $P=0.014$ ; absolute reticulocyte count <sup>**</sup> : $223 \pm 73^*$ vs. $124.9 \pm 73 \times 10^9$ * | (EPO vs. placebo): NEC: 0/40 vs.1/40 <sup>‡</sup> ;sepsis:1/40 vs.3/40 <sup>‡</sup> ; PDA: 2/40 vs.7/40 <sup>‡</sup>                                                                                                                                                                                                                | VLBW infants have lesser need of transfusions if EPO is given during the first six weeks of life                                                                 | Small sample size, short duration of treatment |
| <b>12</b> | Natalucci et al. , 2016 (43) | Preterm infants 26 weeks to 31weeks 6 days ( $n=365$ ) | intravenous rhEPO ( $n=228$ , Dose: 3000U/Kg); Placebo (isotonic saline $n=220$ ) within 3 hours, at 12 to 18 hours and at 36 to 42 hours after birth | (EPO vs. Placebo): mean mental Developmental Index: 93.5,SD 16.0,91.2 to 95.8 vs. 94.5 SD: 17.8, 90.8 to 98.5; $P=0.56$                                                                                                                                                                            | (EPO vs. Placebo): BDP: 66/191 vs. 64/175; sepsis: 24/191 vs. 22/175; NEC: 4/191 vs. 5/175; ROP: 1/191 vs. 5/175; PDA: 55/191 vs. 44/175; PDI: mean: 89.5 vs. 92.1, $P=0.15$ ; cerebral palsy: 8/191 vs. 8/174, $P>0.99$ ; severe hearing impairment:1/191vs. 0/174, $P>0.99$ ; severe visual impairment: 2/191 vs. 0/174, $P=0.50$ | No statistically significant difference was found among very preterm infants who received prophylactic high dose rhEPO for neuroprotection compared with placebo | Small sample size, short duration of treatment |
| <b>13</b> | Obladen et al. , 1991 (51)   | Preterm infants 28-32 weeks ( $n=93$ )                 | Subcutaneous rhEPO ( $n=43$ , Dose: 30U/kg/ every third day); control ( $n=50$ ) from day 4 to day 25                                                 | (EPO vs. control): Volume of red cells transfused (ml/kg): $14.1 \pm 17.8^*$ vs. $16.5 \pm 20.8^{**}$ ; no: of infants with/without transfusion: 23/15 vs. 29/16 <sup>‡</sup> ; haematological values on day 25 (mean):                                                                            | (EPO vs. control): NEC : 1/43 vs. 3/50 <sup>‡</sup> ; PDA: 1/43 vs. 3/50 <sup>‡</sup> ; IVH: 5/43 vs. 5/50 <sup>**</sup> ; BPD: 6/43 vs. 5/50 <sup>‡</sup> ; mortality: 0/43 vs. 1/50 <sup>‡</sup>                                                                                                                                  | rEPO given at this dose is not effective in reducing the transfusion in preterm                                                                                  | Small sample size, short duration              |

## Online Supporting Material

Hct:36 vs. 38; Hb:11.8 vs12.3

|           |                            |                                                                                                      |                                                                                                                                                          |                                                                                                                                                                                                                                                                                                                                                                                                                                                                  |                                                                                                                                                                                                                                                                                         |                                                                                                                                                                                                                                                    |                   |
|-----------|----------------------------|------------------------------------------------------------------------------------------------------|----------------------------------------------------------------------------------------------------------------------------------------------------------|------------------------------------------------------------------------------------------------------------------------------------------------------------------------------------------------------------------------------------------------------------------------------------------------------------------------------------------------------------------------------------------------------------------------------------------------------------------|-----------------------------------------------------------------------------------------------------------------------------------------------------------------------------------------------------------------------------------------------------------------------------------------|----------------------------------------------------------------------------------------------------------------------------------------------------------------------------------------------------------------------------------------------------|-------------------|
| <b>14</b> | Ohls et al.,<br>2001A (44) | Preterm infants $\leq 32$ weeks, Birth weight $\geq 410\text{g}$ to $\leq 1000\text{g}$ ( $n=172$ )  | Intravenous EPO ( $n=87$ , Dose:400U/kg 3 times weekly); placebo/control ( $n=85$ ) from 4 <sup>th</sup> day to 35 <sup>th</sup> week post menstrual age | (EPO vs. Placebo): Transfusion/patient: $4.3 \pm 3.6^*$ vs. $5.2 \pm 4.2^*$ ; $P=0.09$ ; transfused: 84 vs. 87, $P=0.56$ ; Hematocrit (%): $38 \pm 8^*$ vs. $40 \pm 7^*$ , $P<0.05$ ; Reticulocyte count ( $\times 10^3/\mu\text{L}$ ): $211 \pm 128^*$ vs. $234 \pm 127^{**}$ .                                                                                                                                                                                 | (EPO vs. Placebo) : CLD (%): 52 vs. 54 <sup>‡</sup> ; ROP stage 3 (%): 19 vs. 16 <sup>‡</sup> ; IVH grade 3 (%):13 vs.9 <sup>‡</sup> ; NEC (%) :10 vs. 12 <sup>**</sup> ; PDA (%): 36 vs. 46 <sup>‡</sup> ; sepsis (%): 38 vs. 43 <sup>**</sup> ; Mortality (%) :17 vs. 18 <sup>‡</sup> | EPO stimulated erythropoiesis in infants who were <1250 g at birth.                                                                                                                                                                                | Small sample size |
| <b>15</b> | Ohls et al.,<br>2001B (44) | Preterm infants $\leq 32$ weeks, Birth weight $\geq 1001\text{g}$ to $\leq 1250\text{g}$ ( $n=118$ ) | EPO ( $n=59$ , Dose: 400U/Kg thrice weekly); placebo/control ( $n=59$ ) from 4 <sup>th</sup> day to 35 <sup>th</sup> week post menstrual age             | (EPO vs. control): Volume of red cells transfused (ml/kg): $14.1 \pm 17.8^*$ vs. $16.5 \pm 20.8^*$ ; no: of infants with/without transfusion: 23/15 vs. 29/16, $P=ns$ ; haematological values on day 25(mean):<br>Hct:36 vs. 38; Hb:11.8 v. s12.3                                                                                                                                                                                                                | (EPO vs. control): NEC: 1/43 vs. 3/50 <sup>‡</sup> ; PDA: 1/43 vs. 3/50 <sup>‡</sup> ; IVH: 5/43 vs. 5/50 <sup>**</sup> ; BPD: 6/43 vs. 5/50 <sup>‡</sup> ; mortality: 0/43 vs. 1/50 <sup>‡</sup>                                                                                       | EPO stimulated erythropoiesis in infants who were <1250 g at birth.                                                                                                                                                                                | Small sample size |
| <b>16</b> | Ohls et al.,<br>2004 (45)  | Preterm ELBW infants <1000g birth weight ( $n=172$ )                                                 | EPO ( $n=87$ , Dose:400U/Kg 3 times weekly iv or s/c) started at 96 hours of life and continued till 35 weeks; placebo/control ( $n=85$ )                | (EPO vs. Placebo): weight on discharge: $2237 \pm 525^*$ vs. $2164 \pm 537^*$ ; weight on follow up: $10.1 \pm 1.4^*$ vs. $10.4 \pm 1.5^{**}$ ; length on discharge: $43.5 \pm 2.3^*$ vs. $42.8 \pm 2.9^*$ ; length on follow up: $80.2 \pm 3.8^*$ vs. $80.8 \pm 3.4^{**}$ ; discharge head circumference: $32.5 \pm 1.7^*$ vs. $32.1 \pm 1.8^*$ ; Head circumference on follow up: $47.0 \pm 2.1^{**}$ vs $46.6 \pm 1.7^{**}$ ; NDI: 42% vs. 44% <sup>‡</sup> . | (EPO vs. Placebo): NEC: 3/51 vs. 5/51 <sup>‡</sup> ; BPD 33/51 vs. 30/51 <sup>‡</sup> ; IVH 6/51 vs. 1/51 <sup>‡</sup> ; LOS: 61/51 vs. 19/51 <sup>‡</sup> ; ROP: 10/51 vs. 7/51 <sup>‡</sup> ; weight at discharge: $2237 \pm 525^*$ vs. $2164 \pm 537^*$ .                            | EPO does not significantly influence anthropometric measurements, transfusions after discharge, or developmental outcome at 18 to 22 months <sup>‡</sup> corrected age.<br><br>Enteral rhG-CSF and/or rhEPO improves feeding outcome and decreases | Small sample size |

## Online Supporting Material

|    |                             |                                                                              |                                                                                                                                                                                                                |                                                                                                                                                                                                                                        |                                                                                                                                                                                                                                                           |                                                                                                          |                                   |
|----|-----------------------------|------------------------------------------------------------------------------|----------------------------------------------------------------------------------------------------------------------------------------------------------------------------------------------------------------|----------------------------------------------------------------------------------------------------------------------------------------------------------------------------------------------------------------------------------------|-----------------------------------------------------------------------------------------------------------------------------------------------------------------------------------------------------------------------------------------------------------|----------------------------------------------------------------------------------------------------------|-----------------------------------|
|    |                             |                                                                              |                                                                                                                                                                                                                |                                                                                                                                                                                                                                        |                                                                                                                                                                                                                                                           | the risk of NEC.                                                                                         |                                   |
| 17 | Ohls et al., 2013 (52)      | Preterm infants 500-1250g weeks ( <i>n</i> =102)                             | Subcutaneous Darbe ( <i>n</i> =33, Dose:10µg/kg) once per week; Subcutaneous EPO ( <i>n</i> =33, Dose: 400U/kg) three times per week; Placebo ( <i>n</i> =33,3 sham doses per week) till 35 weeks of gestation | (Darbe vs. EPO vs. Placebo): transfusion per subject:1.2±2.4* vs. 1.2±1.6* vs. 2.4±2.9*; <i>P</i> =0.949                                                                                                                               | (Darbe vs.EPO vs. Placebo): CLD: 22/32 vs. 21/32 vs. 20/30 <sup>‡</sup> ; NEC:2/32 vs. 1/32 vs. 2/30 <sup>‡</sup> ; PDA:16/32 vs. 16/32 vs. 15/30 <sup>‡</sup> ; mortality: 2/32 vs. 1/32 vs. 3/30 <sup>‡</sup> ; ROP 2/32 vs. 1/32 vs. 2/30 <sup>‡</sup> | Infants receiving Darbe or EPO received fewer transfusions and fewer donor exposures                     | Small sample size.                |
| 18 | Qiao et al., 2017 (59)      | Preterm infants 28 to 34 weeks ( <i>n</i> =96)                               | Intravenous rhEPO ( <i>n</i> =32, Dose: 400U/kg twice a week); control ( <i>n</i> =31); iron supplement ( <i>n</i> =33) for two weeks                                                                          | (EPO vs. control): reticulocyte: 2.5±0.3 vs. 1.7±0.3; <i>P</i> <0.001; total iron binding capacity (TIBC): 41.6±5.2* vs. 36.7±4.6*; <i>P</i> =0.006                                                                                    | (EPO vs. control): NEC : 0/32 vs. 0/31 <sup>‡</sup> ; ROP: 0/32 vs. 0/31 <sup>‡</sup>                                                                                                                                                                     | rEPO improves reticulocyte count, decreases TIBC and improves haemoglobin transfusion in preterm infants | Short duration                    |
| 19 | Romagnoli et al., 2000 (53) | Preterm infants ≤30 weeks and those of 31-34 weeks with RDS ( <i>n</i> =230) | subcutaneous rhEPO ( <i>n</i> =115,Dose: 300IU/kg 3times per week); control ( <i>n</i> =115; no EPO), from 2nd to 7th week of life                                                                             | (EPO vs. control): transfused infants: 60(52.2) vs. 64 (55.6) <sup>‡</sup> ; number of transfusions: 3.2 ± 2.2* (1±10) vs. 3.7 ± 3.1* (1±15) <sup>‡</sup> ; ROP: 50/115 vs. 25/115, <i>P</i> =0.0007, OR: 2.769; 95% CI: 1.556, 4.929) | (EPO vs. control): NEC:4/115 vs. 4 /115 <sup>‡</sup> ; PDA: 29 /115 vs. 41/115 <sup>‡</sup> ; IVH: 7/115 vs. 7/115 <sup>‡</sup> ; sepsis: 24/115 vs. 30/115 <sup>‡</sup>                                                                                  | Combination of EPO and iron could be associated with increased incidence of ROP                          | Small sample size±                |
| 20 | Samanci et al., 199(17)     | Preterm infants ≤32 weeks, birth weight ≤1250g ( <i>n</i> =24)               | subcutaneous rhEPO ( <i>n</i> =12, Dose: 200U thrice weekly); placebo ( <i>n</i> =12) for four weeks                                                                                                           | (EPO vs. placebo): no: of infants requiring transfusion: 3/12 vs. 8/12**; no: of red blood cell transfusion per infant: 0.4±0.7* vs. 1.1±0.6*                                                                                          | (EPO vs. placebo): NEC: 0/12 vs. 0/12 <sup>‡</sup> ; IVH: 0/12 vs. 0/12 <sup>‡</sup>                                                                                                                                                                      | rEPO is effective in reducing the transfusion in preterm very low birth weight infants                   | Small sample size, short duration |
|    | Shannon et                  | Preterm infants                                                              | Intravenous rhEPO ( <i>n</i> =10,                                                                                                                                                                              | (EPO vs. placebo): number of infants                                                                                                                                                                                                   | EPO vs. placebo): NEC:1/10vs 0/10 <sup>‡</sup> ;                                                                                                                                                                                                          | rEPO given at this dose is                                                                               | Small sample                      |



## Online Supporting Material

|    |                           |                                          |                                                                                                  |                                                                                                                                                                                                                 |                                                                                                                                                                                                                                                                          |                                                                                                                                                                                                                                                        |                                                |
|----|---------------------------|------------------------------------------|--------------------------------------------------------------------------------------------------|-----------------------------------------------------------------------------------------------------------------------------------------------------------------------------------------------------------------|--------------------------------------------------------------------------------------------------------------------------------------------------------------------------------------------------------------------------------------------------------------------------|--------------------------------------------------------------------------------------------------------------------------------------------------------------------------------------------------------------------------------------------------------|------------------------------------------------|
| 21 | al., 1991 (58)            | ≤1250g (n=20)                            | Dose: 200U/kg/week); placebo(n=10) from day 8 to 6 weeks                                         | required transfusion:6/10vs 8/10 <sup>‡</sup>                                                                                                                                                                   | mortality: 1/10 vs. 0/10 <sup>‡</sup> ; neutropenia: 1/10 vs. 3/10 <sup>‡</sup> ; hypertension: 0/10 vs. 0/10 <sup>‡</sup>                                                                                                                                               | safe and feasible in reducing the transfusion in preterm                                                                                                                                                                                               | size                                           |
| 22 | Shannon et al., 1995 (54) | Preterm infants <31 weeks,<1250g (n=157) | rhEPO (n=77, Dose:100U/kg/day) administered subcutaneously 5 days a week 6 weeks; placebo (n=80) | (EPO vs. placebo): erythrocyte transfusion: 1.1± 1.5* per infant vs. 1.6± 1.7*,P=0.046; volume of packed cell transfusion: 16.5± 23*ml vs. 23.9± 25.9* ml, P=0.023; hematocrit: 32± 3.8*% 27.3± 4.9*%, P=0.0001 | (EPO vs. placebo): erythrocyte transfusion: 1.1± 1.5* per infant vs. 1.6± 1.7*, P=0.046; volume of packed cell transfusion: 16.5± 23*ml vs. 23.9± 25.9* ml, P=0.023; hematocrit:32± 3.8*% 27.3± 4.9*%, P=0.0001                                                          | (EPO vs. placebo): NEC: 3/147 vs. 4/150 <sup>‡</sup> ; ROP: 1/147 vs. 3/150 <sup>‡</sup> ; death during treatment: 0/147 vs. 1/150 <sup>‡</sup> ; culture proven sepsis: 6/147 vs. 6/150 <sup>‡</sup> ; feed intolerance: 7/147 vs. 7/150 <sup>‡</sup> | Small sample size, Short duration of treatment |
| 23 | Song et al., 2016 (46)    | Preterm infants ≤32 weeks (n=743)        | Intravenous rhEPO (n=366, Dose:500U/Kg); Placebo(n=377) every other day for 2 weeks              | (EPO vs. Placebo): Death and moderate/severe neurological disability: 43/330 vs. 91/338**                                                                                                                       | (EPO vs. Placebo): ICH III-IV: 24/366 vs. 60/377, P<0.001; PVL: 41/366 vs. 74/377, P=0.002; ROP: 79/366 vs. 97/377, P=0.196; NEC: 25/366 vs. 54/377, P=0.001; BPD: 37/366 vs. 51/377, P=0.168; sepsis: 71/366 vs. 99/377, P=0.015; mortality: 21/330 vs. 34/338, P=0.077 | Repeated low dose rhEPO treatment reduced the risk of long term neurological disability in very preterm infants with no obvious adverse effects                                                                                                        | Short duration of treatment                    |
| 24 | Turker et al., 2005 (57)  | Preterm infants <1500g (n=93)            | subcutaneous rhEPO (n=42, Dose: 750U/Kg/week in 3 doses); control (n=51) from day 5 to day 40    | (EPO vs. control): Number of transfusions per infant during study in <1000g infants:2/15 vs5/15; P=0.004,total PRC volume transfused in infants<1000g (mL/kg/infants): 40 vs. 98; P=0.004                       | (EPO vs. control): NEC:15/42 vs14/51, P=0.5; BPD: 6/42 vs. 10/51, P=0.3; ROP: 1/42 vs. 7/51, P=0.09; IVH: 15/42 vs. 20/51, P=0.6                                                                                                                                         | rhEPO do not increase the risk of ROP,BPD,NEC,IVH and reduce the need of transfusion in infants < 1000g                                                                                                                                                | Small sample size                              |
| 25 | Yeo et al., 2001 (55)     | Preterm infants <33 weeks (n=100)        | Subcutaneous rhEPO (n=50, Dose: 750U/kg/week); Control                                           | (EPO vs. control): mean no: of transfusion per patient: 2.1±1.9 vs3.5±1.6; P=0.04,                                                                                                                              | (EPO vs. control): Death:5/50 vs. 4/50 <sup>‡</sup> ; NEC: 4/50 vs. 2/50 <sup>‡</sup> ; Septicemia: 4/50 vs.                                                                                                                                                             | rhEPO stimulates erythropoiesis and                                                                                                                                                                                                                    | Small sample size, short                       |

## Online Supporting Material

---

|                                      |                                                                                         |                                                                                             |                                           |                          |
|--------------------------------------|-----------------------------------------------------------------------------------------|---------------------------------------------------------------------------------------------|-------------------------------------------|--------------------------|
| ( <i>n</i> =50) from day 5 to day 40 | volume of blood transfused per patient<br>(mL/kg): 34.9±32* vs. 56.6±2*; <i>P</i> =0.03 | 7/50 <sup>‡</sup> ; CLD: 9/50 vs. 12/50 <sup>‡</sup> ; ROP: 17/50<br>vs. 15/50 <sup>‡</sup> | reduces the need for<br>blood transfusion | duration of<br>treatment |
|--------------------------------------|-----------------------------------------------------------------------------------------|---------------------------------------------------------------------------------------------|-------------------------------------------|--------------------------|

---

<sup>1</sup>BPD: bronchopulmonary dysplasia; CLD: Chronic lung disease; CI: Confidence interval; ELBW: Extremely low birth weight; ICH: Intra cranial hemorrhage; IVH: Intraventricular hemorrhage; LOS: Late onset sepsis; NEC: Necrotizing enterocolitis; OR: Odds ratio; PDA: Patent ductus arteriosus; PVL: Periventricular leukomalacia rhEPO: Recombinant human erythropoietin; rhG-CSF: Recombinant human Granulocyte colony stimulating factor; ROP: Retinopathy of prematurity; TRAP-6: Thrombin receptor activator peptide 6

<sup>2,3</sup> for these columns, \* mean±SD; \*\* *P*<0.01; <sup>‡</sup>*P*=NS (not significant)

## Online Supporting Material

---

**Supplemental Table 2: Sensitivity analysis of the RCTs.**

| Item                                               | Number of studies | Sample size | RR (95% CI) FEM                    |
|----------------------------------------------------|-------------------|-------------|------------------------------------|
| Studies with low ROB on random sequence generation | 14                | 2592        | 0.61 (0.44,0.83); <i>P</i> =0.002  |
| Studies with low ROB on allocation concealment     | 17                | 3243        | 0.66 (0.51,0.87); <i>P</i> =0.003  |
| Studies where NEC was the primary outcome          | 2                 | 493         | 0.49 (0.19,1.30); <i>P</i> =0.15   |
| Studies where EPO was administered intravenously   | 13                | 2403        | 0.68 (0.51, 0.91); <i>P</i> =0.009 |
| Studies where EPO was administered subcutaneously  | 10                | 1512        | 1.01 (0.68,1.50); <i>P</i> =0.95   |
| Studies where EPO was administered enterally       | 2                 | 110         | 0.62 (0.15,2.59); <i>P</i> =0.52   |

<sup>1</sup>ROB: risk of bias; NEC: necrotizing enterocolitis; EPO: erythropoietin

# Online Supporting Material

**Supplemental Table 3: The evidence as per GRADE guidelines**

| Outcome | Absolute Risk                       |                                                     | Relative effect, RR             | Number of participants | Quality of evidence | Comment <sup>^</sup> |
|---------|-------------------------------------|-----------------------------------------------------|---------------------------------|------------------------|---------------------|----------------------|
|         | Estimate without EPO administration | Corresponding Risk estimate with EPO administration | Risk estimate (95% CI)          |                        | GRADE               |                      |
| NEC     | 146/1967<br>(7.42%)                 | 120/2058<br>(5.83%)                                 | 0.77(0.61,0.97), <i>P</i> =0.03 | 4025                   | High                | See below            |

<sup>^</sup>The evidence was deemed high in view of low risk of bias in majority of the included studies, narrow CI around the effect size estimate, very low *p* value for effect size estimate and mild statistical heterogeneity

# Online Supporting Material

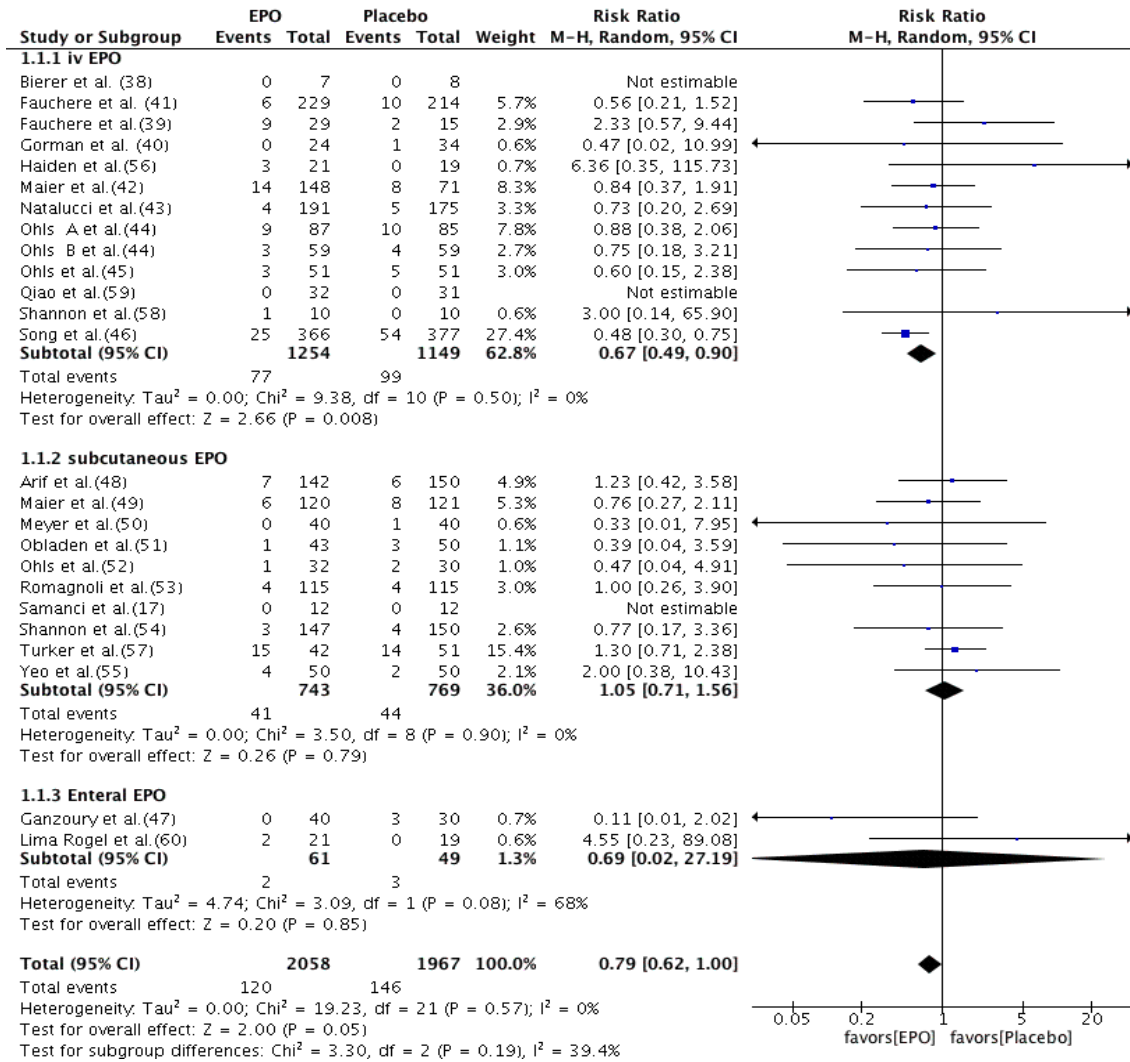

Supplemental Figure 1: Effect of recombinant erythropoietin (rEPO) on necrotizing enterocolitis in preterm neonates (random effect model)

## Online Supporting Material

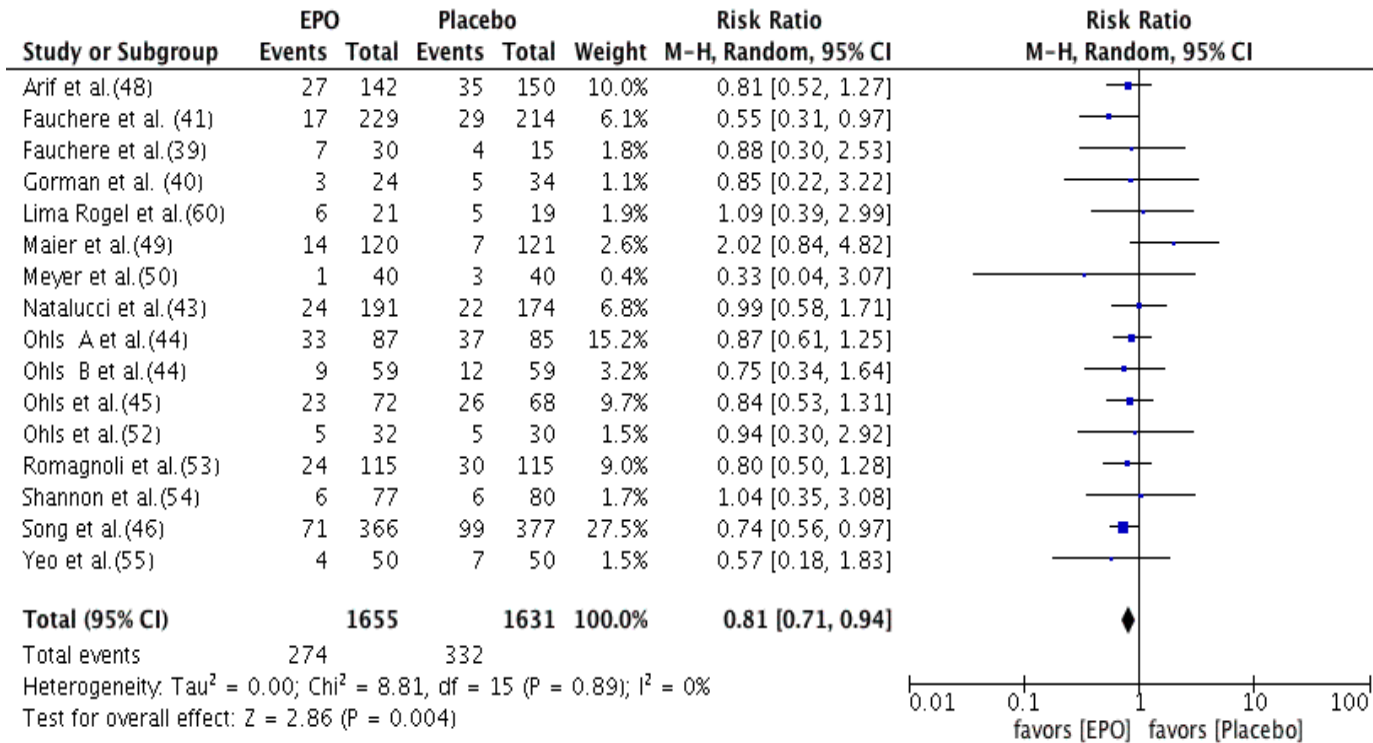

Supplemental Figure 2: Effect of recombinant erythropoietin (rEPO) on sepsis in preterm neonates (random effect model)

# Online Supporting Material

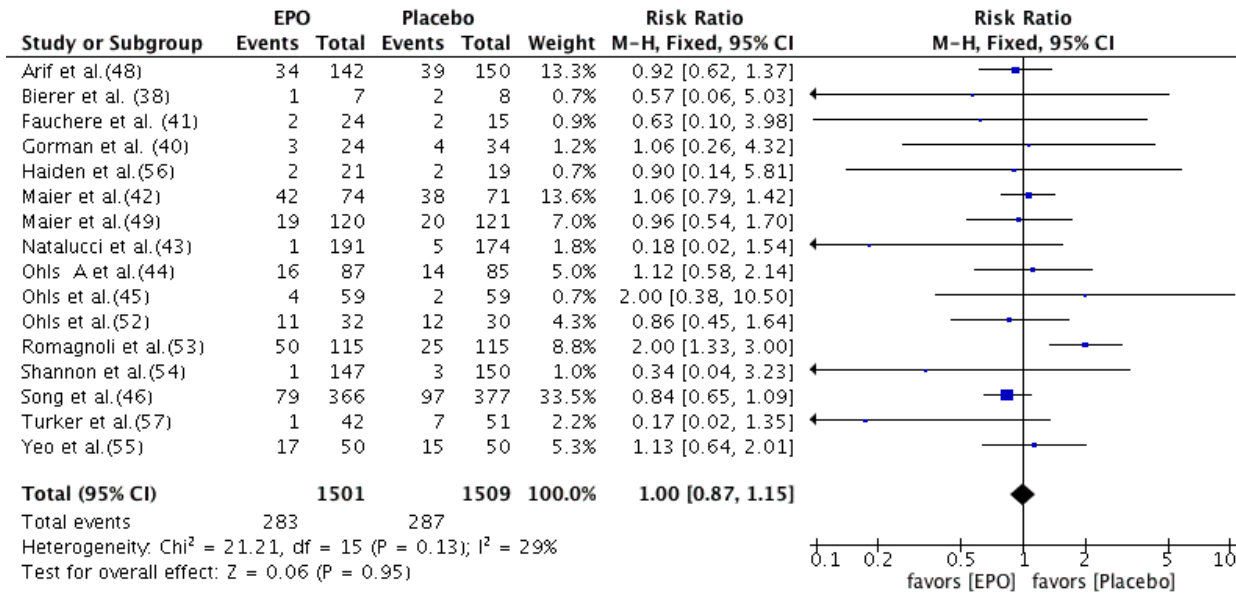

Supplemental Figure 3: Effect of recombinant erythropoietin (rEPO) on Retinopathy of Prematurity (ROP) in preterm neonates (fixed effect model)

## Online Supporting Material

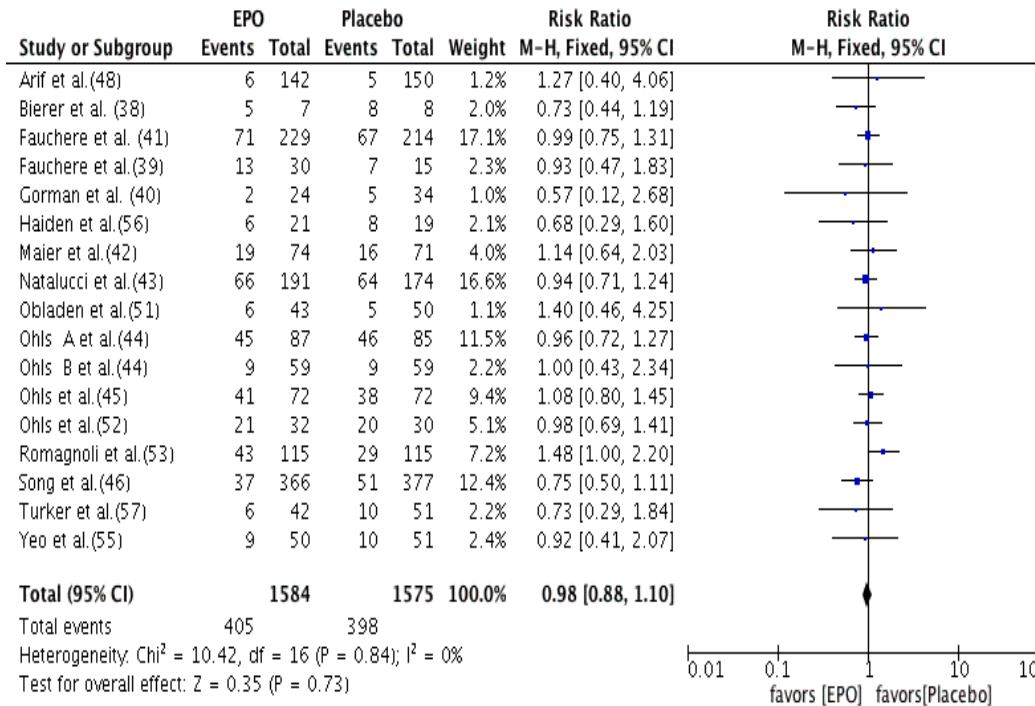

**Supplemental Figure 4: Effect of recombinant erythropoietin (rEPO) on Bronchopulmonary Dysplasia (BPD) in preterm neonates (fixed effect model)**



## Online Supporting Material

---

### References

1. Higgins JP, Altman DG, Gotzsche PC, Juni P, Moher D, Oxman AD, Savovic J, Schulz KF, Weeks L, Sterne JA. The Cochrane Collaboration's tool for assessing risk of bias in randomised trials. *BMJ (Clinical research ed)*. 2011;343:d5928. Epub 2011/10/20.
2. DerSimonian R, Laird N. Meta-analysis in clinical trials revisited. *Contemporary clinical trials*. 2015;45(Pt A):139-45.
3. Higgins J GS e. Cochrane Handbook for Systematic Reviews of Interventions.version 5.10. In *The Cochrane Collaboration*; 2011. 2011; (updated March 2011).
